# Supplementary material for: In Vitro Evaluation of Antimicrobial Effect of Phytobiotics Mixture on Salmonella spp. Isolated from Chicken Broiler
Source: MDPI journal article supplement (doi:10.3390/antibiotics11070868), 2022-06-28
Supplement: s1 [file s1]

# In vitro evaluation of antimicrobial effect of phytobiotics mixture on *Salmonella* spp. isolated from chicken broiler.

Hubert Iwiński<sup>1,5\*</sup>, Karolina Wódz<sup>2</sup>, Karolina Chodkowska<sup>3,5</sup>, Tomasz Nowak<sup>2</sup>, Henryk Różański<sup>4,5</sup>,

<sup>1</sup> Department of Chemistry, The Faculty of Food Science, Wrocław University Of Environmental And Life Sciences, C.K. Norwida 25,50-375 Wrocław, Poland; [hubert.iwinski@upwr.edu.pl](mailto:hubert.iwinski@upwr.edu.pl) (H.I.)

<sup>2</sup> Laboratory of Molecular Biology, Vet-Lab Brudzew, Turkowska 58c, 62-720 Brudzew, Poland; [karolina.wodz@labbrudzew.pl](mailto:karolina.wodz@labbrudzew.pl) (K.W.); [tomasz@labbrudzew.pl](mailto:tomasz@labbrudzew.pl) (T.N.)

<sup>3</sup> Krzyżanowski Partners Spółka z o.o., Zakładowa 7,26-670 Pionki, Poland; [k.chodkowska@jkrzyzanowski.pl](mailto:k.chodkowska@jkrzyzanowski.pl) (K.Ch.)

<sup>4</sup> Laboratory of Industrial and Experimental Biology, Institute for Health and Economics, Carpathian State College in Krosno, Rynek 1, 38-400 Krosno, Poland; [rozanski@rozanski.ch](mailto:rozanski@rozanski.ch) (H.R.)

<sup>5</sup> AdiFeed Sp. z o.o., Opaczewska 02-201 Warszawa

\* Correspondence: [hubert.iwinski@upwr.edu.pl](mailto:hubert.iwinski@upwr.edu.pl)

## Table of content

|                                                                                                                                      |   |
|--------------------------------------------------------------------------------------------------------------------------------------|---|
| Table S1. A summary of the results of biochemical reactions for the strain of <i>Salmonella</i> isolated from different samples..... | 1 |
| Figure S1. MIC evaluation of <i>S. Typhimurium</i> .....                                                                             | 3 |
| Figure S2. MIC evaluation of <i>S. Enteritidis</i> .....                                                                             | 4 |
| Figure S3. MIC evaluation of <i>S. Kentucky</i> .....                                                                                | 4 |
| Figure S4. Negative control.....                                                                                                     | 5 |

**Table S1.** A summary of the results of biochemical reactions for the strain of *Salmonella* isolated from different samples.

| REACTIONS/ENZYMES | VITEK2<br><i>Salmonella enterica</i><br>ssp. <i>enterica</i><br><i>Salmonella</i><br><i>Typhimurium</i><br>1/2/3/4 | VITEK2<br><i>Salmonella enterica</i> ssp.<br><i>enterica</i><br><i>Salmonella</i><br><i>Kentucky</i><br>1/2 | VITEK2<br><i>Salmonella enterica</i><br>ssp. <i>enterica</i><br><i>Salmonella</i><br><i>Enteritidis</i><br>1/2/3/4/5/6 |
|-------------------|--------------------------------------------------------------------------------------------------------------------|-------------------------------------------------------------------------------------------------------------|------------------------------------------------------------------------------------------------------------------------|
| APPA              | -/-/-/-                                                                                                            | -/-                                                                                                         | -/-/-/-/-                                                                                                              |
| ADO               | -/-/-/-                                                                                                            | -/-                                                                                                         | -/-/-/-/-                                                                                                              |
| PyrA              | +/-/-/-                                                                                                            | -/-                                                                                                         | -/-/-/-/+/-                                                                                                            |
| IARL              | -/-/-/-                                                                                                            | -/-                                                                                                         | -/-/-/-/-                                                                                                              |

|       |         |     |           |
|-------|---------|-----|-----------|
| dCEL  | -/-/-/- | -/- | -/-/-/-/- |
| BGAL  | +/-/-/- | +/+ | -/-/-/-/+ |
| H2S   | +/+/+/+ | +/+ | +/+/+/+/+ |
| BNAG  | -/-/-/- | -/- | -/-/-/-/- |
| AGLTp | -/-/-/- | -/- | -/-/-/-/- |
| dGLU  | +/+/+/+ | +/+ | +/+/+/+/+ |
| GGT   | +/+/-/- | -/- | +/+/-/-/+ |
| OFF   | +/+/+/+ | +/+ | +/+/+/+/+ |
| BGLU  | -/-/-/- | -/- | -/-/-/-/- |
| dMAL  | +/+/+/+ | +/+ | +/+/+/+/+ |
| dMAN  | +/+/+/+ | +/+ | +/+/+/+/+ |
| dMNE  | +/+/+/+ | +/+ | +/+/+/+/+ |
| BXYL  | -/-/-/- | -/- | -/-/-/-/- |
| BAlap | -/-/-/- | -/- | -/-/-/-/- |
| ProA  | +/-/-/- | -/- | +/-/-/-/- |
| LIP   | -/-/-/- | -/- | -/-/-/-/- |
| PLE   | -/+/-/- | -/- | -/-/-/-/- |
| TyrA  | +/+/-/- | -/- | -/+/-/-/- |
| URE   | -/-/-/- | -/- | -/-/-/-/- |
| dSOR  | +/+/+/+ | +/+ | +/+/+/+/+ |
| SAC   | -/-/-/- | -/- | -/-/-/-/- |
| dTAG  | +/+/+/+ | -/- | +/+/+/+/- |
| dTRE  | +/+/+/+ | +/+ | +/+/+/+/+ |
| CIT   | +/+/+/+ | -/+ | +/+/+/+/+ |
| MNT   | -/-/-/- | -/+ | -/+/-/-/- |
| 5KG   | -/-     | -/- | -/-/-/-/- |
| ILATk | +/-/-/- | -/- | -/-/-/-/- |
| AGLU  | -/-/-/- | -/- | -/-/-/-/- |
| SUCT  | +/-/-/- | -/- | -/-/-/-/+ |
| NAGA  | -/-/-/- | -/- | -/-/-/-/- |
| AGAL  | +/+/+/+ | +/+ | +/+/+/+/+ |
| PHOS  | -/++/+/ | -/- | -/+/-/-/- |
| GlyA  | -/-/-/- | -/- | -/-/-/-/- |
| ODC   | +/+/+/+ | +/+ | +/+/+/+/+ |
| LDC   | +/+/+/+ | +/+ | +/+/+/+/+ |
| IHISa | -/-/-/- | -/- | -/-/-/-/- |
| CMT   | +/+/+/+ | +/+ | +/+/+/+/+ |
| BGUR  | -/-/-/- | -/- | -/-/-/-/- |
| O129R | +/-+/+  | +/- | +/-/-/-/- |
| GGAA  | -/-/-/- | -/- | -/-/-/-/- |
| IMLTa | -/-/-/- | -/- | -/-/-/-/- |
| ELLM  | -/-/-/- | -/- | -/-/-/-/- |
| ILATa | -/-/-/- | -/- | -/-/-/-/- |

*Common reaction for VITEK, API 20 E and Lab-made tests:* BGAL/ONPG - beta-galactosidase, H2S - H2S production, dGLU/GLU - D-glucose, dMAN/MAN - D-mannitol, URE – urease, dSOR/SOR - D-sorbitol (not

includet Lab-made), SAC - saccharose/sucrose, CIT - citrate (sodium), ODC - ornithine decarboxylase (not includet Lab-made), LDC - lysine decarboxylase, **VITEK**: APPA - Ala-Phe-Pro-arylamidase, ADO – adonitol, PyrA - L-pyrrolydonyl-arylamidase, IARL - L-arabitol, dCEL - D-cellobiose, BNAG - beta-n-acetyl-glucosaminidase, AGLTp - Glutamyl Arylamidase pNA, GGT - gamma-glutamyl-transferase, OFF - fermentation/ glucose, BGLU - beta-glucosidase, dMAL - D-maltose, dMNE - D-mannose, BXYL - beta-xylosidase, BALap - beta-alanine arylamidase pNA, PrpA - L-Proline arylamidase, LIP – lipase, PLE – palatinose, TyrA - Tyrosine arylamidase, dTAG - D-tagatose, dTRE - D-trehalose, MNT – malonate, 5KG - 5-keto-d-gluconate, ILATk - L-lactate alkalisation, AGLU - alpha-glucosidase, SUCT - succinate alkalisation, NAGA - beta-N-acetyl-galactosaminidase, AGAL - alpha-galactosidase, PHOS – phosphatase, GlyA - glycine arylamidase, IHISa - L-histidine assimilation, CMT – coumarate, BGUR - beta-glucuronidase, O129R - O/129 resistance (comp.vibrio.), GGAA - Glu-Gly-Arg-arylamidase, IMLTa - L-malate assimilation, ELLM – ellman, ILATa - L-lactate assimilation **API 20E**: ADH - arginine dihydrolase, TDA - tryptophane deaminase, IND - indole production, VP - acetoin production (Voges Proskauer), GEL – gelatinase, INO – inositol, RHA – rhamnose, MEL – melibiose, AMY - amygdalin, ARA – arabinose

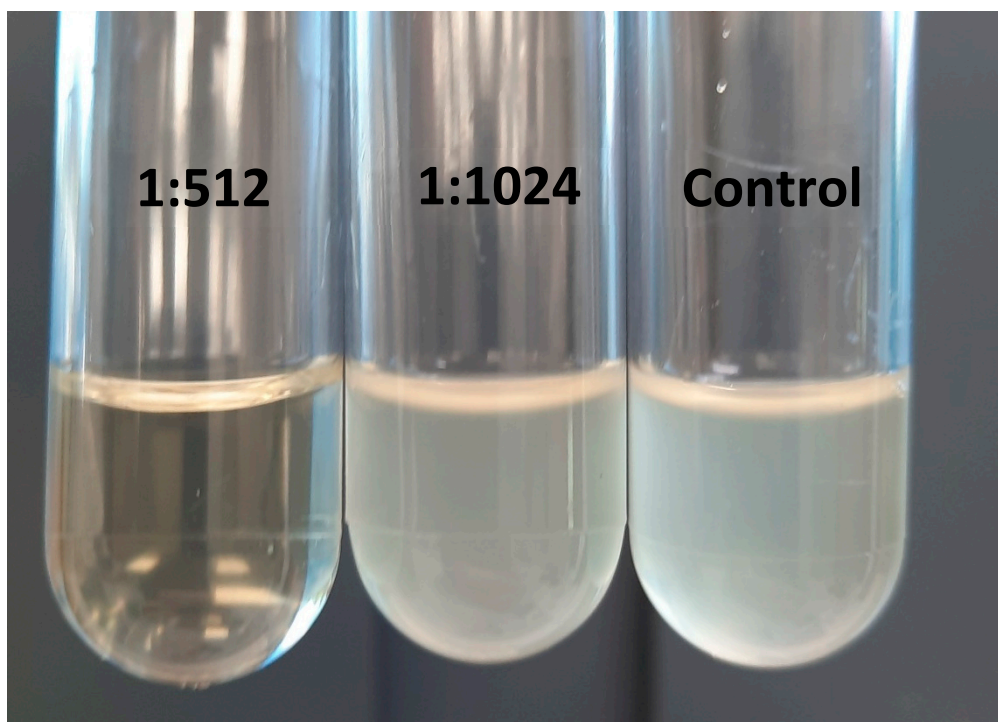

**Figure S1.** MIC evaluation of *S. Typhimurium*

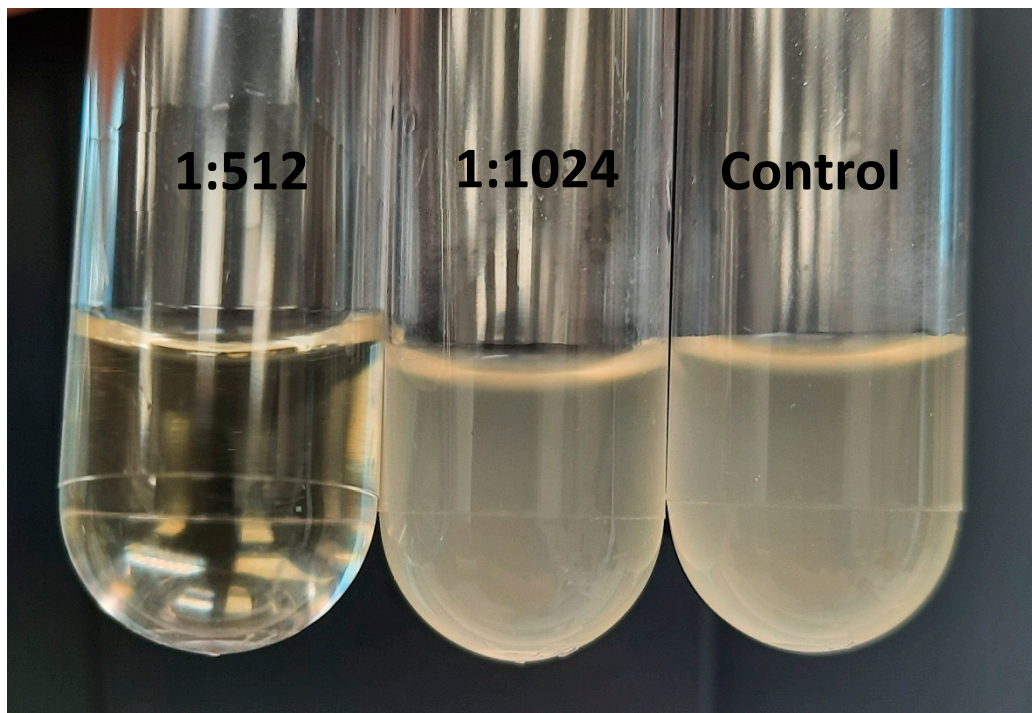

**Figure S2.** MIC evaluation of *S. Enteritidis*

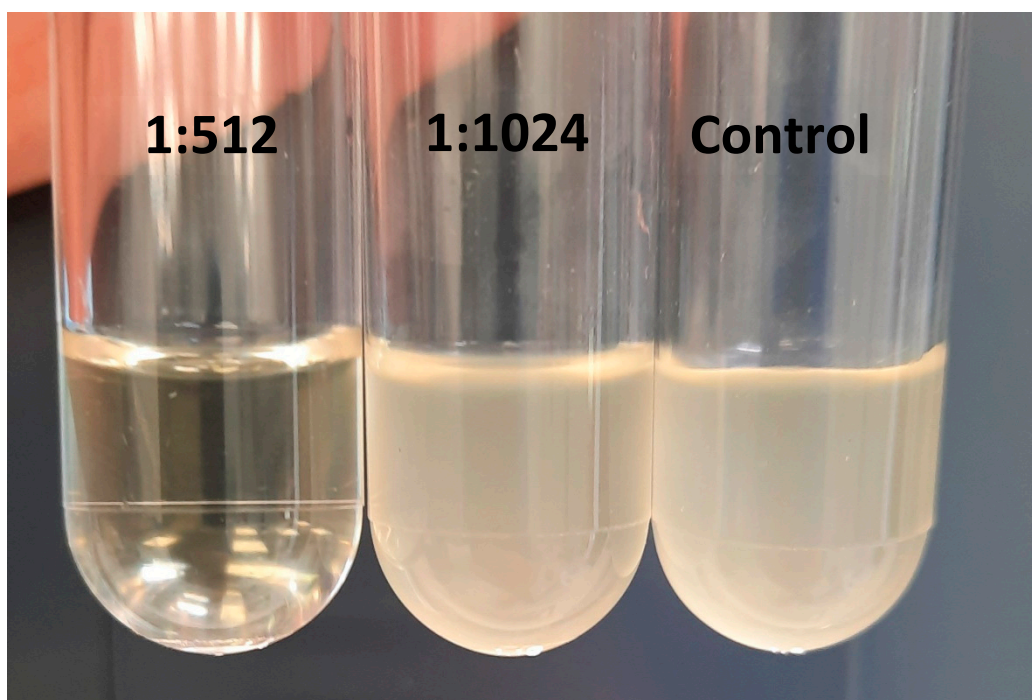

**Figure S3.** MIC evaluation of *S. Kentucky*

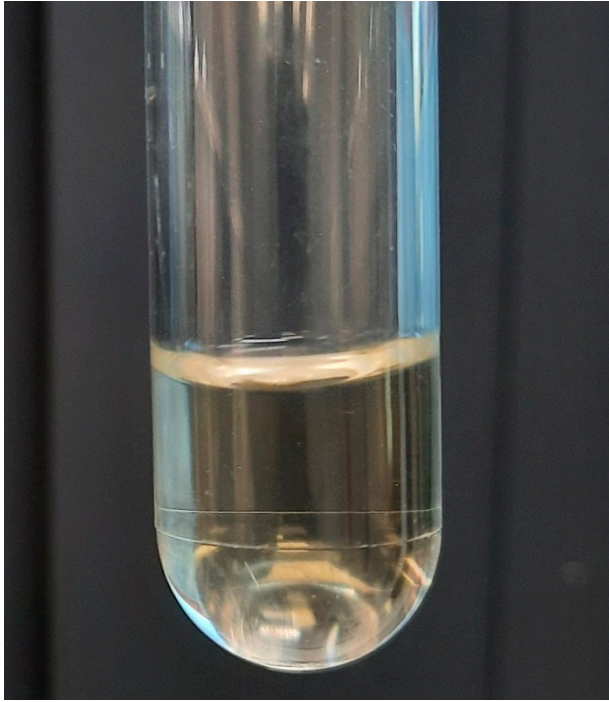

**Figure S4.** Negative control
